# Supplementary material for: CRISPR/Cas9-Mediated Treatment Ameliorates the Phenotype of the Epidermolytic Palmoplantar Keratoderma-like Mouse
Source: PubMed Central journal article supplement — Mol Ther Nucleic Acids. 2018 Jun 2;12:220–8. doi: 10.1016/j.omtn.2018.05.005 (PMC6023945; doi:10.1016/j.omtn.2018.05.005), 2018-06-02
Supplement: mmc1.pdf [file mmc1.pdf]

OMTN, Volume 12

## **Supplemental Information**

### **CRISPR/Cas9-Mediated Treatment Ameliorates the Phenotype of the Epidermolytic Palmoplantar Keratoderma-like Mouse**

**Xiao-Rui Luan, Xiao-Ling Chen, Yue-Xiao Tang, Jin-Yan Zhang, Xiang Gao, Hai-Ping Ke, Zhao-Yu Lin, and Xian-Ning Zhang**

SUPPLEMENTAL INFORMATION

Supplemental Figures

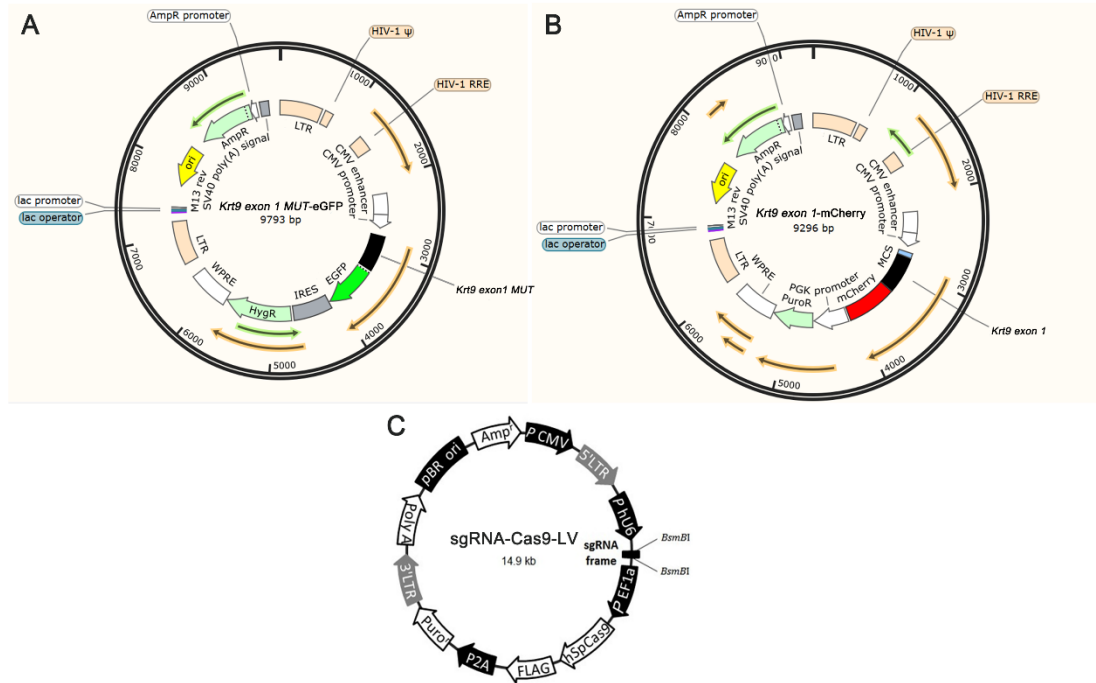

**Figure S1. Constructed Vectors Used.** (A, B) Diagrams of two plasmids used to establish the HeLa Hez cell line which stably expressed both *Krt9* exon1-eGFP and *Krt9* exon1 MUT-mCherry. (C) Diagram of LV delivery system for CRISPR-Cas9. Cas9-LV, sg1-Cas9-LV, and sg2-Cas9-LV all had the FLAG-expressing frame. While Cas9-LV had no sgRNA frame, sg1-Cas9-LV and sg2-Cas9-LV each had a different sgRNA frame.

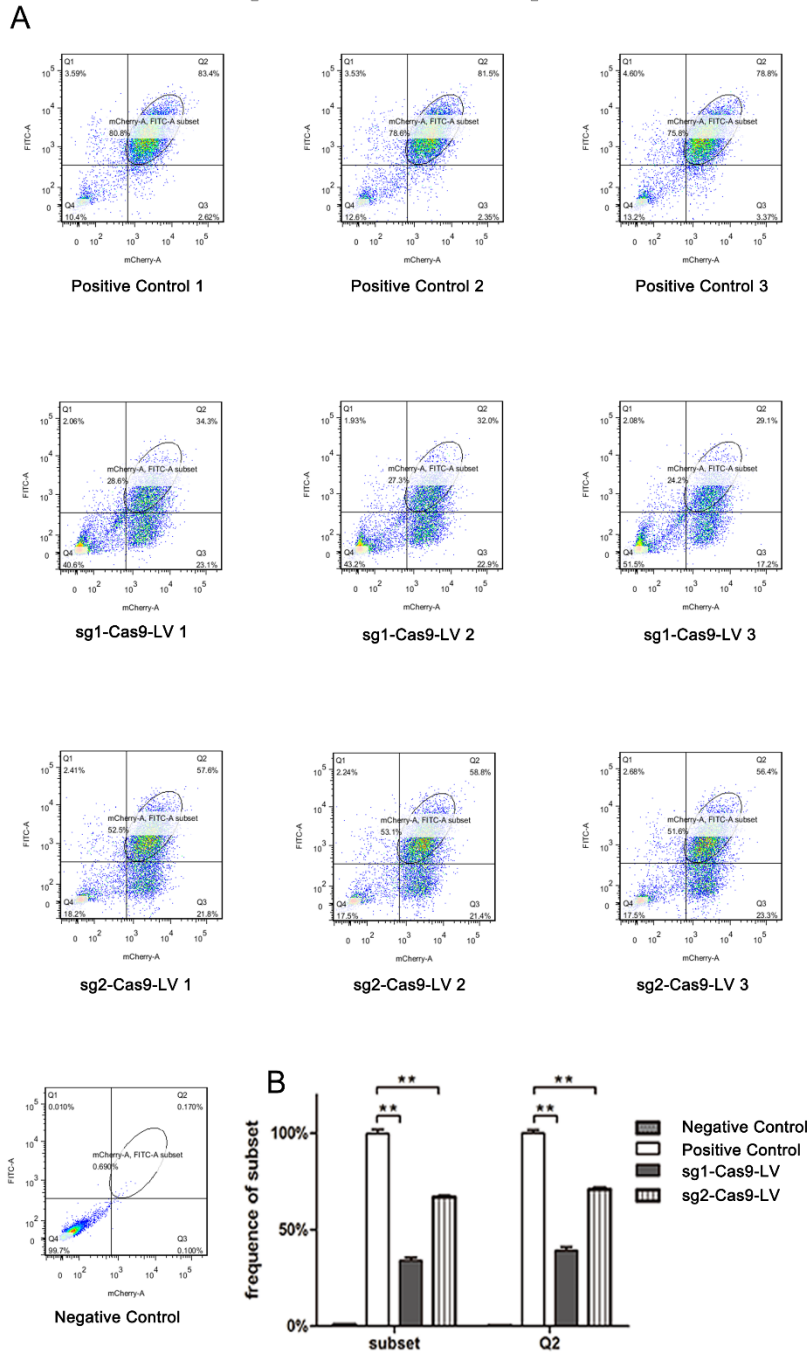

**Figure S2. Flow Cytometric Analysis of Efficacy of CRISPR/Cas9 System.** (A) FACs of HeLa Hezcells; circle and Q2 are subsets of cells with mCherry and eGFP fluorescence. The HeLa Hez cells were treated with different LVs. (B) Analyses of subset (circled) and Q2. 10,000 cells were collected from each sample (mean  $\pm$  SEM;  $n=3$ ;  $**P<0.01$ ). Each experiment was repeated at least three times.

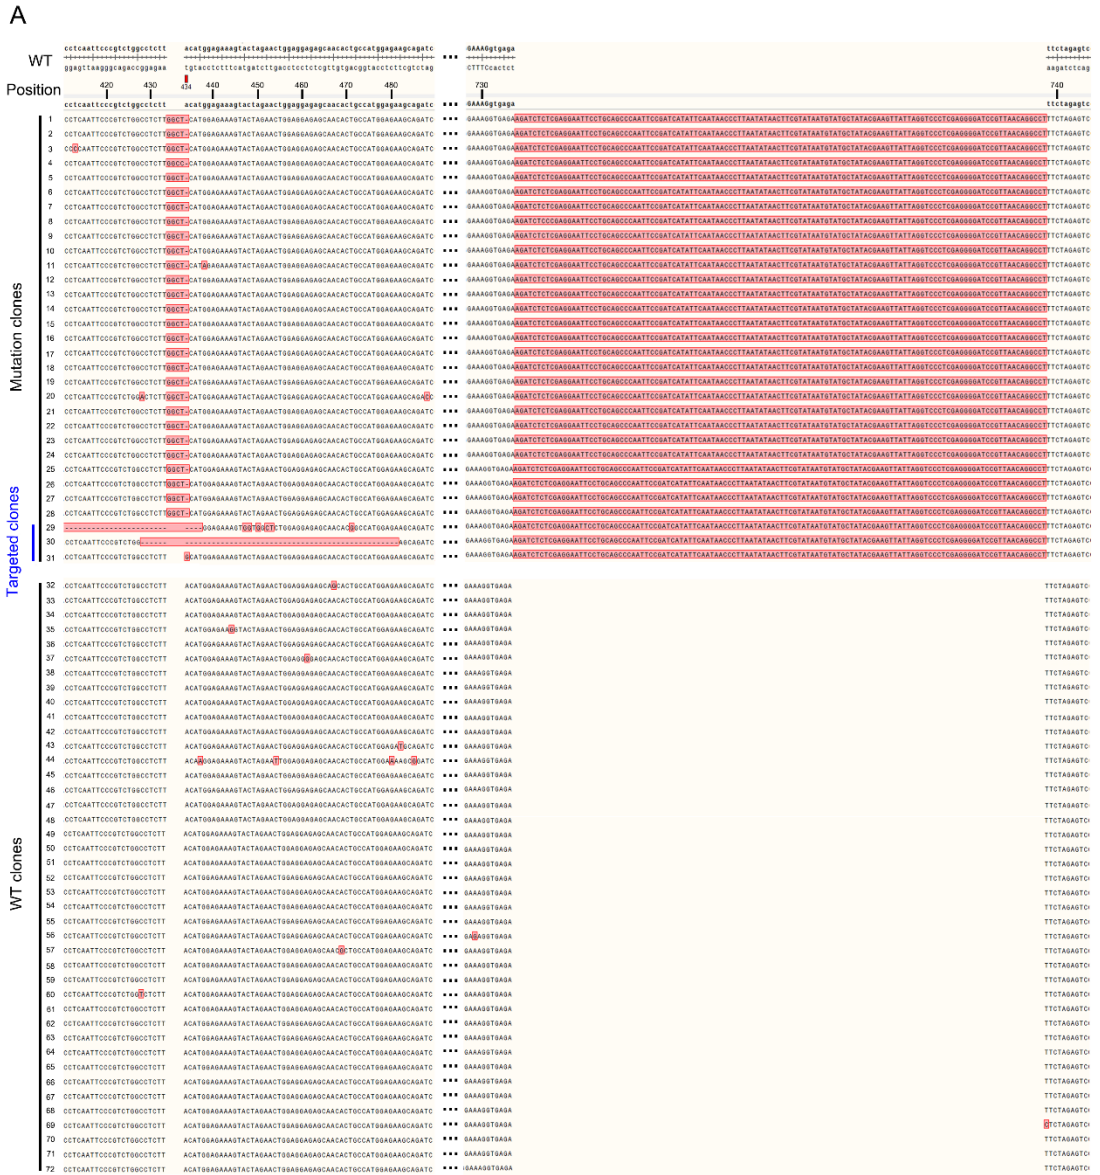

**Figure S3. Sanger Sequencing Analysis of T-A Clones.** (A, B) *Krt9/c.434delAinsGGCT* was the mutation site. As the KI-*Krt9* mice had other bases (GGCT) inserted within exon 1 of *Krt9*, these bases could be identified by Sanger sequencing. Sequencing analyses of a total of 72 clones after sg1-Cas9-LV treatment revealed 31 mutated clones and 41 wild-type clones. Three clones with the mutated allele were targeted by sg1-Cas9-LV.

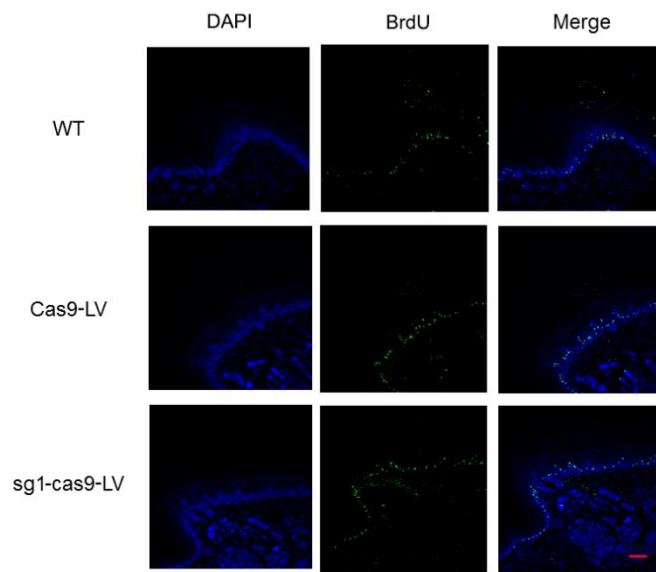

**Figure S4. Immunofluorescence Against BrdU.** IF staining against BrdU indicated amelioration in the epidermis of pads after sg1-Cas9-LV treatment. Scale bar, 50 $\mu$ m.

Supplemental Tables

Table S1. List of Predicted Top 49 Potential Off-target Sites

|    | Sequence                | Locus            | Gene                      |
|----|-------------------------|------------------|---------------------------|
| 1  | CAGTCTGGCCTCTTGGCTCCCAG | chr16: +90882305 | <i>Evalc</i>              |
| 2  | CCATCTGCCCTCTTGGCTCTGGG | chr14: +25613172 | <i>Zmiz1</i>              |
| 3  | GCGTCTGGCTTCTTGGCTCTAGG | chr9: +111451036 | <i>Dclk3</i>              |
| 4  | CAGTTTGCCTTCTTGGCTCAAAG | chr17: +8690449  | <i>Pde10a</i>             |
| 5  | TCCTCTGGCCTCATGGCTCACAG | chr5: +35367777  |                           |
| 6  | CCTTCTGGCATCTTGGATCATAG | chr1: -135242443 |                           |
| 7  | TCCTCTACCCTCTTGGCTCATGG | chr5: -35726673  | <i>Sh3tc1</i>             |
| 8  | CTGTCTTCCATCTTGGCTCAAGG | chr5: -142554011 |                           |
| 9  | CCCTTTTGCTTCTTGGCTCAGAG | chr13: -40573456 |                           |
| 10 | CATTCTGTTCTCTTGGCTCAGAG | chr17: +81953655 |                           |
| 11 | CCTTACGACCTCTTGGCTCACAG | chr6: -56055534  |                           |
| 12 | CCTACAGTCCTCTTGGCTCATGG | chr18: -5507756  | <i>Gm10125</i>            |
| 13 | CTGTTTGGCTACTTGGCTCATAG | chr1: -141190474 |                           |
| 14 | CCCTCTGGCATCTTAGCTCAGAG | chr2: -91136498  | <i>Mybpc3</i><br>(exonic) |
| 15 | CCCTCTGCCTCTTGGCTTAAGG  | chr5: +45434088  | <i>Qdpr</i><br>(exonic)   |
| 16 | CCTCCTGGCTGCTTGGCTCACAG | chr12: -77928545 |                           |
| 17 | CCATCTGCCTACTTGGCTCATAG | chr18: +10503415 | <i>Greb11</i>             |
| 18 | CATTCTGTCCTTTTGGCTCACAG | chr6: -148197489 | <i>Ergic2</i>             |
| 19 | GTCTCTGGCCTCTTGGCTCTGGG | chr4: -124255444 |                           |
| 20 | CAGACTGCCCTCTTGGCTCCAAG | chr11: -95402645 |                           |
| 21 | CTGGCTGTCCTCTTGGCTCTAAG | chr11: +44788874 | <i>Ebfl</i>               |
| 22 | CCTCTTGGCCTCTTGGCTCCCAG | chr2: -181430900 | <i>Zbtb46</i>             |
| 23 | CAGACTGGCTTTTTGGCTCATGG | chr2: -169325990 |                           |
| 24 | TCGTCTGCCTTCTTGGCTCTGAG | chr9: +67972906  | <i>Vps13c</i><br>(exonic) |
| 25 | CTCTCTGGCTTCTTGGCTCCAGG | chr17: -48899189 |                           |
| 26 | GTGGCTGGCCTCTTGGTTCACAG | chr2: -173417917 |                           |
| 27 | GCAGCTGGCCTCTTGGGTCAGAG | chr11: +35865560 | <i>Wwc1</i>               |
| 28 | GGGCCTGGCCTCCTGGCTCATGG | chr17: +90027127 |                           |
| 29 | CAGTTTTGACTCTTGGCTCAGGG | chr2: +172958569 |                           |
| 30 | GCCCCTGGCCTCATGGCTCATAG | chr10: -68004046 | <i>Rtkn2</i>              |
| 31 | CGGGCTGTCCTCCTGGCTCATAG | chr9: +47096948  |                           |
| 32 | CAGTACCCCTCTTGGCTCAGGG  | chr16: -3854315  | <i>Zfp174</i>             |

---

|    |                         |                   |                                 |
|----|-------------------------|-------------------|---------------------------------|
|    |                         |                   | (exonic)                        |
| 33 | CCCACCTGGCTCTTGGCTCAGAG | chr2: +116705891  |                                 |
| 34 | CAGTCTTGCCTCTTAGCTCACAG | chr12: +110681716 | <i>1700001k1</i><br><i>9Rik</i> |
| 35 | CGGCCCCGCCTCTTGGCTCATGG | chr13: +17786816  | <i>Cdk13</i>                    |
| 36 | CTGTAATGCCTCTTGGCTCACAG | chr5: -112962525  | <i>Adrbk2</i>                   |
| 37 | CCTTTTGCCTCCTGGCTCACGG  | chr5: +148511528  | <i>Ubl3</i>                     |
| 38 | CATTCTGGCTTCTTGGTTCACAG | chr11: +95134670  |                                 |
| 39 | CAGTCTGACATCCTGGCTCAAGG | chr7: -87242684   |                                 |
| 40 | GCGTGGGGTCTCTTGGCTCATGG | chr5: +147914988  |                                 |
| 41 | CCGTGTTCCCACTTGGCTCAGAG | chr13: +35849660  | <i>Cdyl</i>                     |
| 42 | CAGCCTGTCCTCTTGGCTTAGAG | chr12: +92172149  | <i>Gm40598</i>                  |
| 43 | CTTCCTGGCCTCTTGGCTAAGAG | chr9: +50277419   |                                 |
| 44 | CTCTCTGTCCTCTTGGCTGAGGG | chr17: -27930058  | <i>Anks1</i>                    |
| 45 | CGGTAAGGCCTGTTGGCTCAGAG | chr9: +62634220   |                                 |
| 46 | TCTTCTGGTCTCTTGGCTCTCGG | chr5: +114851500  |                                 |
| 47 | CCGTCTGATCTCTTAGCTCAAAG | chr15: +73789447  | <i>Morh5</i>                    |
| 48 | TAGTCTGTCCTCTTAGCTCAGGG | chr3: -45836873   | <i>Gm32340</i>                  |
| 49 | ACCTCTAGCCTCATGGCTCAAAG | chr6: +55004645   |                                 |

---

**Table S2. Summary of DNA Sequencing Results within the Top 10 Off-target Sites**

|    | <b>Sequence</b>         | <b>Locus</b>     | <b>Treated/Untreated</b> |
|----|-------------------------|------------------|--------------------------|
| 1  | CAGTCTGGCCTCTTGGCTCCCAG | chr16: +90882305 | 0/20                     |
| 2  | CCATCTGCCCTCTTGGCTCTGGG | chr14: +25613172 | 0/20                     |
| 3  | GCGTCTGGCTTCTTGGCTCTAGG | chr9: +111451036 | 0/20                     |
| 4  | CAGTTTGCCTTCTTGGCTCAAAG | chr17: +8690449  | 0/20                     |
| 5  | TCCTCTGGCCTCATGGCTCACAG | chr5: +35367777  | 1/19                     |
| 6  | CCTTCTGGCATCTTGGATCATAG | chr1: -135242443 | 1/19                     |
| 7  | TCCTCTACCCTCTTGGCTCATGG | chr5: -35726673  | 0/20                     |
| 8  | CTGTCTTCCATCTTGGCTCAAGG | chr5: -142554011 | 0/20                     |
| 9  | CCCTTTGCTTCTTGGCTCAGAG  | chr13: -40573456 | 0/20                     |
| 10 | CATTCTGTTCTCTTGGCTCAGAG | chr17: +81953655 | 1/19                     |
